# Supplementary material for: Galectin-3 as Prognostic Predictor in Patients with COVID-19 Acute Respiratory Failure
Source: Research Square preprint supplement (doi:10.21203/rs.3.rs-532891/v1), 2021-05-24
Supplement: Supplementary file 1 [file b8d647219df4e55a5993a13f.docx]

**Additional file 3.** Receiving operator characteristic curve for laboratory, clinical and arterial blood gas data

|  | AUC†† | SE‡‡ | 95% CI** |
| --- | --- | --- | --- |
| Age | 0.797 | 0.043 | 0.71 to 0.88 |
| Number of comorbidities | 0.731 | 0.047 | 0.64 to 0.82 |
| †PaO2/‡FiO2 admission | 0.285 | 0.056 | 0.17 to 0.39 |
| Lactate (mmol/L) | 0.638 | 0.054 | 0.53 to 0.74 |
| Ineterleukin-6 (pg/ml) | 0.752 | 0.049 | 0.65 to 0.85 |
| *WBC (x10^3/uL) | 0.525 | 0.057 | 0.41 to 0.64 |
| Creatinine (mg/dL) | 0.718 | 0.058 | 0.6 to 0.83 |
| †† LDH (U/L) | 0.733 | 0.054 | 0.63 to 0.84 |
| § NT-pro-BNP (pg/mL) | 0.803 | 0.038 | 0.73 to 0.88 |
| C-Reactive Protein (mg/L) | 0.730 | 0.049 | 0.63 to 0.82 |
| Procalcitonin (ng/ml) | 0.792 | 0.044 | 0.7 to 0.88 |
| D-dimer (ug/L) | 0.717 | 0.051 | 0.62 to 0.82 |
| Presepsin (pg/ml) | 0.859 | 0.038 | 0.78 to 0.93 |
| Vitamin D (ng/ml) | 0.319 | 0.054 | 0.21 to 0.43 |
| ll SOFA score | 0.885 | 0.034 | 0.82 to 0.95 |
| Galectin-3 (ng(ml) | 0.901 | 0.032 | 0.84 to 0.96 |

††AUC, area under the curve

‡‡SE, standard error

**CI, confidence interval

†PaO2, Pressure of Arterial Oxygen;

‡FiO2, Fraction of Inspired Oxygen;

*WBC, White Blood (cell) Count;

†† LDH, Lactate DeHydrogenase;

§ NT-pro-BNP, N-Terminal pro-Brain-type Natriuretic Peptide;

ll SOFA, Sequential Organ Failure Assessment.
